# Supplementary material for: The Relationship between Early Growth and Survival of Hatchling Saltwater Crocodiles (Crocodylus porosus) in Captivity
Source: PLoS One. 2014 Jun 24;9(6):e100276. doi: 10.1371/journal.pone.0100276 (PMC4069027; doi:10.1371/journal.pone.0100276)
Supplement: Data S1 — Individual size and growth data at 4 days, 24 days and predicted at 90 days for 300 hatchlings. (XLS) [file pone.0100276.s001.xls]

## Sheet: Sheet1
ID	Hatch date	Final date	Age at final invent	Clutch	SVL4D	BM4D	BC4D	SVL24D	BM24D	BC24D	SVL90D	BM90D	Fate (0=DEAD; 1=LIVE)
1	2011-08-10	2011-10-07	58	A75	140	68.2	0.487143	144	65	0.451389	150	37	0
2	2011-08-10	2011-10-09	60	A75	141	72.7	0.515603	151	72	0.476821	156	42	0
3	2011-08-10	2011-10-02	53	A75	140	70.7	0.505	144	68	0.472222	150	41	0
4	2011-08-10	2011-10-11	62	A75	144	71.4	0.495833	146	68	0.465753	150	41	0
5	2011-08-10	2011-10-10	61	A75	139	70.6	0.507914	143	68	0.475524	152	42	0
6	2011-07-30	2011-11-02	95	A71	138	69.9	0.506522	143	68	0.475524	153	42	0
7	2011-04-14	2011-06-24	71	M28	140	70.4	0.502857	150	70	0.466667	155	53	0
8	2011-07-01	2011-10-01	92	M55	146	75.5	0.517123	152	70	0.460526	152	40	0
9	2011-07-01	2011-10-18	109	M55	143	66.4	0.464336	146	63	0.431507	151	37	0
10	2011-07-18	2011-10-21	95	A70	140	65.2	0.465714	145	60	0.413793	150	44	0
11	2011-08-10	2011-10-21	72	A75	139	65	0.467626	146	66	0.452055	147	55	0
12	2011-07-30	2011-10-21	83	A71	140	72.6	0.518571	144	69	0.479167	150	50	0
13	2011-07-30	2011-10-21	83	A71	140	69.9	0.499286	149	70	0.469799	152	51	0
14	2011-04-06	2011-07-06	91	M43	145	71.6	0.493793	160	72	0.45	157	45	0
15	2011-07-01	2011-10-14	105	M55	148	75.4	0.509459	152	69	0.453947	154	41	0
16	2011-08-10	2011-10-21	72	A77	144	69.5	0.482639	153	71	0.464052	152	58	0
17	2011-07-01	2011-10-11	102	M55	147	78.6	0.534694	149	72	0.483221	149	43	0
18	2011-07-30	2011-10-21	83	A71	138	73.4	0.531884	153	79	0.51634	157	57	0
19	2011-07-01	2011-10-15	106	M55	147	73.3	0.498639	148	73	0.493243	159	42	0
20	2011-04-06	2011-07-18	103	A20	142	73.5	0.517606	156	77.4	0.496154	161	40	0
21	2011-07-30	2011-10-21	83	A71	140	74.9	0.535	154	83	0.538961	162	62	0
22	2011-08-10	2011-10-21	72	A77	141	72.5	0.514184	150	75	0.5	152	65	0
23	2011-08-10	2011-10-21	72	A77	147	71.3	0.485034	153	73	0.477124	155	64	0
24	2011-08-10	2011-10-21	72	A77	142	71.4	0.502817	152	73	0.480263	154	64	0
25	2011-08-10	2011-10-21	72	A77	144	73.9	0.513194	146	67	0.458904	154	58	0
26	2011-07-30	2011-10-21	83	A71	140	73.9	0.527857	146	68	0.465753	156	59	0
27	2011-08-10	2011-10-21	72	A77	146	70.7	0.484247	151	65	0.430464	154	59	0
28	2011-04-14	2011-07-28	105	BP4	146	76.9	0.526712	165	77.6	0.470303	162	49	0
29	2011-04-14	2011-10-02	171	M28	147	76.3	0.519048	152	72.7	0.478289	156	44	0
30	2011-08-10	2011-10-21	72	A77	140	72.3	0.516429	150	78	0.52	152	61	0
31	2011-04-14	2011-09-27	166	BP4	144	77.2	0.536111	148	74.7	0.50473	154	40	0
32	2011-04-06	2011-08-04	120	A20	140	75.3	0.537857	158	79.2	0.501266	157	39	0
33	2011-04-06	2011-10-18	195	M43	142	69.8	0.491549	155	69.5	0.448387	153	45	0
34	2011-07-01	2011-10-21	112	M55	151	79.1	0.523841	152	74	0.486842	154	64	0
35	2011-07-01	2011-10-21	112	M55	152	77.7	0.511184	153	75	0.490196	162	63	0
36	2011-07-01	2011-10-21	112	M55	153	80.8	0.528105	154	77	0.5	154	63	0
37	2011-08-10	2011-10-21	72	A77	141	72.5	0.514184	153	74	0.48366	157	62	0
38	2011-07-18	2011-10-21	95	A70	145	56.9	0.392414	147	60	0.408163	157	57	0
39	2011-04-06	2011-09-29	176	M43	146	77	0.527397	150	75.8	0.505333	165	45	0
40	2011-07-01	2011-10-21	112	M55	149	76.9	0.516107	152	74	0.486842	165	67	0
41	2011-04-14	2011-10-09	178	BP4	149	77	0.516779	160	76	0.475	163	49	0
42	2011-07-01	2011-10-21	112	M55	150	75.6	0.504	152	73	0.480263	161	69	0
43	2011-08-10	2011-10-07	58	A75	144	71.2	0.494444	149	70	0.469799	154	62	0
44	2011-07-01	2011-10-21	112	M55	146	78.1	0.534932	151	78	0.516556	161	66	0
45	2011-07-18	2011-10-21	95	A70	146	60.9	0.417123	148	60	0.405405	159	57	0
46	2011-04-06	2011-09-26	173	M43	145	74.5	0.513793	161	76.7	0.476398	162	40	0
47	2011-04-06	2011-09-11	158	A20	144	72.1	0.500694	160	74.9	0.468125	161	44	0
48	2011-04-06	2011-10-29	206	M43	144	73.4	0.509722	160	75.1	0.469375	168	42	0
49	2011-07-06	2011-10-21	107	M62	140	70.4	0.502857	148	69.5	0.469595	158	58	0
50	2011-08-10	2011-10-21	72	A77	144	65	0.451389	149	66	0.442953	157	60	0
51	2011-07-01	2011-10-21	112	M55	149	72.9	0.489262	155	71	0.458065	160	66	0
52	2011-04-06	2011-10-01	178	A20	145	76	0.524138	160	82.3	0.514375	165	44	0
53	2011-08-10	2011-10-21	72	A75	135	68.1	0.504444	147	72	0.489796	160	65	0
54	2011-08-10	2011-10-21	72	A77	148	73.7	0.497973	150	69	0.46	159	61	0
55	2011-07-30	2011-10-21	83	A71	139	70.8	0.509353	144	68	0.472222	159	61	0
56	2011-07-30	2011-10-21	83	A71	139	72.2	0.519424	160	93	0.58125	180	103	1
57	2011-08-10	2011-10-21	72	A77	143	71.7	0.501399	162	96	0.592593	176	103	1
58	2011-07-06	2011-10-21	107	M62	149	66.1	0.443624	157	74.6	0.475159	171	80.1142	1
59	2011-07-18	2011-10-21	95	A70	140	61.2	0.437143	145	66	0.455172	164	80.3291	1
60	2011-07-18	2011-10-21	95	A70	147	57.3	0.389796	155	74	0.477419	172	84	1
61	2011-08-10	2011-10-21	72	A77	145	72.2	0.497931	162	95	0.58642	185	108	1
62	2011-07-30	2011-10-21	83	A71	140	71.5	0.510714	151	84	0.556291	174	90	1
63	2011-07-01	2011-10-21	112	M55	152	74.9	0.492763	162	92	0.567901	165	98	1
64	2011-07-30	2011-10-21	83	A71	140	71.2	0.508571	161	99	0.614907	181	99	1
65	2011-04-14	2011-10-21	190	BP4	149	76.6	0.514094	158	77.7	0.491772	170	86.6486	1
66	2011-08-10	2011-10-21	72	A77	145	75	0.517241	155	77	0.496774	170	87.6102	1
67	2011-04-06	2011-10-21	198	A20	136	68.1	0.500735	158	75.2	0.475949	169	89.556	1
68	2011-04-06	2011-10-21	198	M43	149	73.7	0.494631	165	78.7	0.47697	168	91.1224	1
69	2011-04-06	2011-10-21	198	M43	143	74.5	0.520979	162	77.5	0.478395	168	91.4553	1
70	2011-04-14	2011-10-21	190	BP4	150	73.8	0.492	155	71.5	0.46129	175	91.4967	1
71	2011-07-18	2011-10-21	95	A70	144	57.4	0.398611	152	70	0.460526	170	91.5363	1
72	2011-08-10	2011-10-21	72	A77	142	73.2	0.515493	155	79	0.509677	172	92.0164	1
73	2011-07-18	2011-10-21	95	A70	143	55.4	0.387413	151	74	0.490066	177	92.3964	1
74	2011-07-01	2011-10-21	112	M55	152	77	0.506579	155	79	0.509677	164	93.9411	1
75	2011-04-06	2011-10-21	198	A20	145	74.4	0.513103	154	81.7	0.530519	166	101	1
76	2011-07-18	2011-10-21	95	A70	145	65.8	0.453793	155	79	0.509677	167	94.1151	1
77	2011-06-17	2011-10-21	126	A44	146	63.7	0.436301	158	72	0.455696	168	95.9055	1
78	2011-04-06	2011-10-21	198	A20	143	75.6	0.528671	161	82.2	0.510559	173	96.1335	1
79	2011-04-14	2011-10-21	190	M28	143	71.5	0.5	150	70.4	0.469333	181	96.907	1
80	2011-04-06	2011-10-21	198	A20	139	68.8	0.494964	160	75.3	0.470625	173	97.9138	1
81	2011-07-01	2011-10-21	112	M55	152	79.4	0.522368	164	86	0.52439	178	98.3845	1
82	2011-07-06	2011-10-21	107	M62	145	67.7	0.466897	157	75.1	0.478344	165	99.136	1
83	2011-06-17	2011-10-21	126	A44	143	67.6	0.472727	155	84	0.541935	165	93	1
84	2011-04-14	2011-10-21	190	M28	146	71.6	0.490411	152	75.3	0.495395	170	101.722	1
85	2011-04-06	2011-10-21	198	M43	145	76	0.524138	160	80	0.5	165	102.326	1
86	2011-07-01	2011-10-21	112	M55	151	77.9	0.515894	156	94	0.602564	168	105	1
87	2011-04-14	2011-10-21	190	M28	145	69.8	0.481379	153	77.2	0.504575	175	102.88	1
88	2011-08-10	2011-10-21	72	A77	142	72.6	0.511268	164	108	0.658537	187	136	1
89	2011-06-17	2011-10-21	126	A44	148	65.8	0.444595	157	76	0.484076	164	104.701	1
90	2011-07-01	2011-10-21	112	M55	150	73.3	0.488667	156	83	0.532051	178	104.823	1
91	2011-06-17	2011-10-21	126	A44	148	65.9	0.44527	156	79	0.50641	171	105.49	1
92	2011-07-18	2011-10-21	95	A70	147	58.4	0.397279	158	85	0.537975	172	105	1
93	2011-07-30	2011-10-21	83	A71	141	71.5	0.507092	164	106	0.646341	193	118	1
94	2011-04-06	2011-10-17	194	M43	140	72.5	0.517857	156	74.3	0.476282	185	106.613	1
95	2011-08-10	2011-10-21	72	A77	140	70.7	0.505	153	77	0.503268	189	108.612	1
96	2011-04-06	2011-10-17	194	M43	144	69.2	0.480556	161	75.6	0.469565	181	108.629	1
97	2011-04-14	2011-10-17	186	M28	145	71.2	0.491034	156	77.2	0.494872	177	108.635	1
98	2011-07-30	2011-10-21	83	A71	139	71.5	0.514388	160	118	0.7375	181	124	1
99	2011-04-14	2011-10-21	190	M28	150	76.7	0.511333	160	83.8	0.52375	171	110.483	1
100	2011-04-14	2011-10-17	186	M28	146	76.6	0.524658	157	81.9	0.521656	182	110.979	1
101	2011-04-06	2011-10-17	194	A20	147	64.5	0.438776	152	65.7	0.432237	164	111.529	1
102	2011-07-06	2011-10-21	107	M62	148	65.7	0.443919	160	74.4	0.465	171	112.187	1
103	2011-08-10	2011-10-21	72	A75	145	69.8	0.481379	156	88	0.564103	184	121	1
104	2011-07-18	2011-10-21	95	A70	148	59.9	0.40473	160	87	0.54375	180	114	1
105	2011-07-30	2011-10-21	83	A71	138	73.6	0.533333	163	115	0.705521	190	132	1
106	2011-07-06	2011-10-21	107	M62	145	66.2	0.456552	159	80.1	0.503774	169	117.81	1
107	2011-04-14	2011-10-17	186	M28	151	79.1	0.523841	162	83.2	0.51358	194	151	1
108	2011-04-14	2011-10-17	186	BP4	149	78.7	0.528188	162	82.4	0.508642	178	119.191	1
109	2011-04-06	2011-10-17	194	M43	146	72.9	0.499315	162	80.2	0.495062	183	119.656	1
110	2011-04-06	2011-10-17	194	A20	145	74.6	0.514483	160	79	0.49375	177	120.008	1
111	2011-08-10	2011-10-21	72	A77	144	73.3	0.509028	162	89	0.549383	183	122.392	1
112	2011-04-14	2011-10-21	190	BP4	150	76.7	0.511333	165	86.9	0.526667	178	122.884	1
113	2011-04-06	2011-10-14	191	A20	141	73.8	0.523404	160	79.9	0.499375	185	123.034	1
114	2011-04-06	2011-10-17	194	A20	146	78	0.534247	165	84.2	0.510303	183	123.364	1
115	2011-08-10	2011-10-21	72	A75	142	72.2	0.508451	157	96	0.611465	192	136	1
116	2011-07-06	2011-10-21	107	M62	140	59.1	0.422143	160	82.5	0.515625	174	123.647	1
117	2011-04-06	2011-10-17	194	A20	142	74.2	0.522535	162	84	0.518519	179	123.656	1
118	2011-04-06	2011-10-17	194	M43	144	74.2	0.515278	164	87.5	0.533537	185	124.535	1
119	2011-07-01	2011-10-21	112	M55	147	74.8	0.508844	154	91	0.590909	181	126.497	1
120	2011-04-14	2011-10-17	186	M28	146	76.2	0.521918	159	77.9	0.489937	174	126.51	1
121	2011-04-14	2011-10-17	186	M28	145	73.4	0.506207	155	78.9	0.509032	171	126.897	1
122	2011-08-10	2011-10-21	72	A77	141	66.2	0.469504	163	100	0.613497	189	148	1
123	2011-07-30	2011-10-21	83	A71	140	73.8	0.527143	155	84	0.541935	180	127.639	1
124	2011-07-06	2011-10-21	107	M62	143	67.1	0.469231	157	76.8	0.489172	165	128.133	1
125	2011-04-06	2011-10-17	194	A20	141	74.5	0.528369	160	85	0.53125	185	129.284	1
126	2011-06-17	2011-10-21	126	A44	150	68	0.453333	162	93	0.574074	169	113	1
127	2011-04-14	2011-10-17	186	M28	146	74.3	0.508904	160	80.7	0.504375	181	129.488	1
128	2011-06-17	2011-10-21	126	A44	146	70	0.479452	154	82	0.532468	172	129.695	1
129	2011-04-06	2011-10-14	191	A20	140	76.5	0.546429	161	84.2	0.522981	185	130.652	1
130	2011-07-06	2011-10-21	107	M62	147	69.2	0.470748	160	87.2	0.545	175	130.736	1
131	2011-04-06	2011-10-17	194	A20	146	77.4	0.530137	167	88.4	0.529341	185	131.442	1
132	2011-04-14	2011-10-17	186	M28	143	72.5	0.506993	155	80.8	0.52129	169	132.594	1
133	2011-07-01	2011-10-21	112	M55	150	78.5	0.523333	159	86	0.540881	170	132.849	1
134	2011-07-18	2011-10-21	95	A70	142	62	0.43662	157	93	0.592357	182	131	1
135	2011-08-10	2011-10-21	72	A75	145	74.8	0.515862	154	88	0.571429	190	133.552	1
136	2011-07-06	2011-10-21	107	M62	145	67.9	0.468276	165	87.7	0.531515	175	133.733	1
137	2011-04-06	2011-10-17	194	A20	145	78.1	0.538621	165	91.1	0.552121	181	133.937	1
138	2011-04-06	2011-10-17	194	A20	144	78.5	0.545139	160	81.7	0.510625	177	134.177	1
139	2011-06-17	2011-10-21	126	A44	150	66.5	0.443333	160	92	0.575	185	134.267	1
140	2011-04-06	2011-10-17	194	M43	149	75.9	0.509396	165	85.6	0.518788	177	135.087	1
141	2011-04-06	2011-10-17	194	M43	142	72.7	0.511972	164	89.4	0.545122	182	135.452	1
142	2011-04-06	2011-10-21	198	A20	140	71.2	0.508571	165	84.8	0.513939	184	135.528	1
143	2011-07-01	2011-10-21	112	M55	150	80.6	0.537333	160	100	0.625	183	136.97	1
144	2011-07-30	2011-10-21	83	A71	141	75.8	0.537589	146	73	0.5	187	138.035	1
145	2011-04-14	2011-10-21	190	M28	145	73.9	0.509655	159	93.1	0.585535	176	138.33	1
146	2011-04-06	2011-10-17	194	A20	141	71.4	0.506383	162	81	0.5	189	139.999	1
147	2011-07-30	2011-10-21	83	A71	137	70.2	0.512409	152	89	0.585526	184	140.245	1
148	2011-07-06	2011-10-21	107	M62	148	67.6	0.456757	170	98.9	0.581765	178	131	1
149	2011-04-06	2011-10-17	194	M43	145	72.2	0.497931	166	89.3	0.537952	186	145.552	1
150	2011-04-06	2011-10-21	198	A20	146	73.5	0.503425	164	88.9	0.542073	187	146.655	1
151	2011-04-06	2011-10-17	194	A20	144	74	0.513889	159	84.2	0.52956	190	147.814	1
152	2011-04-06	2011-10-17	194	M43	149	76.2	0.511409	167	82	0.491018	179	148.201	1
153	2011-04-14	2011-10-17	186	BP4	150	74.8	0.498667	161	76.5	0.475155	184	148.316	1
154	2011-07-06	2011-10-21	107	M62	147	73	0.496599	160	91.2	0.57	194	149.516	1
155	2011-07-06	2011-10-21	107	M62	144	71	0.493056	160	89.5	0.559375	189	152.428	1
156	2011-08-10	2011-10-21	72	A75	139	64.2	0.461871	155	85	0.548387	191	152.6	1
157	2011-07-30	2011-10-21	83	A71	140	72	0.514286	152	76	0.5	187	155.153	1
158	2011-07-01	2011-10-21	112	M55	147	72.1	0.490476	160	98	0.6125	182	155.987	1
159	2011-07-18	2011-10-21	95	A70	143	61.1	0.427273	157	87	0.55414	180	156.973	1
160	2011-06-17	2011-10-21	126	A44	150	70.8	0.472	163	108	0.662577	178	131	1
161	2011-04-06	2011-10-17	194	A20	140	71.6	0.511429	165	98.4	0.596364	181	157.659	1
162	2011-04-06	2011-10-17	194	A20	145	76.3	0.526207	163	89.4	0.548466	193	158.899	1
163	2011-06-17	2011-10-21	126	A44	144	68.7	0.477083	160	108	0.675	179	134	1
164	2011-04-14	2011-10-17	186	M28	145	72.1	0.497241	151	71.9	0.476159	186	161.976	1
165	2011-04-06	2011-10-17	194	A20	142	72.9	0.51338	161	83.8	0.520497	191	162.029	1
166	2011-04-06	2011-10-14	191	A20	145	74.9	0.516552	166	94.5	0.569277	189	162.036	1
167	2011-08-10	2011-10-21	72	A77	143	62.5	0.437063	157	95	0.605096	190	166.154	1
168	2011-07-06	2011-10-21	107	M62	140	67.4	0.481429	168	102	0.607143	178	167.997	1
169	2011-07-06	2011-10-21	107	M62	142	66.8	0.470423	155	75.8	0.489032	185	168.205	1
170	2011-06-17	2011-10-21	126	A44	145	69.7	0.48069	160	100	0.625	175	168.347	1
171	2011-07-30	2011-10-17	79	A71	143	75.7	0.529371	166	127	0.76506	196	183	1
172	2011-04-06	2011-10-17	194	A20	140	70.9	0.506429	164	99.4	0.606098	187	170.33	1
173	2011-04-14	2011-10-17	186	M28	148	77.6	0.524324	158	83.6	0.529114	186	172.187	1
174	2011-04-14	2011-10-21	190	M28	145	75	0.517241	156	79.1	0.507051	175	173.384	1
175	2011-04-14	2011-10-17	186	M28	143	71.5	0.5	160	83.8	0.52375	176	173.693	1
176	2011-07-06	2011-10-21	107	M62	140	65.7	0.469286	164	105.5	0.643293	187	174.224	1
177	2011-07-06	2011-10-21	107	M62	142	68.7	0.483803	167	97.3	0.582635	186	174.356	1
178	2011-04-06	2011-10-17	194	A20	145	74.6	0.514483	163	90.6	0.555828	187	177.848	1
179	2011-07-06	2011-10-21	107	M62	144	64.5	0.447917	170	114	0.670588	185	164	1
180	2011-07-06	2011-10-21	107	M62	141	66.8	0.473759	166	90.7	0.546386	190	180.015	1
181	2011-04-06	2011-10-17	194	A20	144	76.7	0.532639	165	84.9	0.514545	178	180.343	1
182	2011-07-06	2011-10-21	107	M62	142	66	0.464789	165	99.1	0.600606	183	181.031	1
183	2011-04-14	2011-10-21	190	M28	146	72.8	0.49863	160	79.1	0.494375	188	181.756	1
184	2011-06-17	2011-10-21	126	A44	145	66.3	0.457241	158	98	0.620253	185	182.247	1
185	2011-04-14	2011-10-17	186	CB5	149	71	0.47651	158	77.7	0.491772	181	182.402	1
186	2011-04-06	2011-10-17	194	M43	146	77.3	0.529452	161	87.2	0.541615	191	184.168	1
187	2011-07-30	2011-10-21	83	A71	140	71.7	0.512143	161	115	0.714286	198	184.526	1
188	2011-07-06	2011-10-21	107	M62	146	65.6	0.449315	165	90.2	0.546667	189	185.512	1
189	2011-07-06	2011-10-21	107	M62	145	71.2	0.491034	164	91.5	0.557927	193	189.306	1
190	2011-04-06	2011-10-17	194	M43	140	71.4	0.51	165	85.7	0.519394	185	191.007	1
191	2011-04-14	2011-10-17	186	CB5	150	79.5	0.53	162	89.8	0.554321	186	191.023	1
192	2011-07-06	2011-10-21	107	M62	148	66.6	0.45	175	115.7	0.661143	181	191.909	1
193	2011-04-06	2011-10-17	194	A20	140	70.7	0.505	161	87.6	0.544099	179	195.9	1
194	2011-04-06	2011-10-17	194	A20	147	73.9	0.502721	160	86.4	0.54	180	196.932	1
195	2011-07-06	2011-10-21	107	M62	142	69.1	0.48662	162	99.4	0.61358	181	197.869	1
196	2011-04-14	2011-10-17	186	M28	145	77	0.531034	163	97.3	0.596933	184	198.616	1
197	2011-07-06	2011-10-21	107	M62	147	66.7	0.453741	166	97.2	0.585542	184	201.236	1
198	2011-07-06	2011-10-21	107	M62	143	66.1	0.462238	169	102.3	0.605325	183	202.216	1
199	2011-04-14	2011-10-17	186	M28	145	73.5	0.506897	166	95.5	0.575301	187	202.248	1
200	2011-04-14	2011-10-17	186	CB5	151	75.2	0.498013	170	94.4	0.555294	190	202.29	1
201	2011-07-30	2011-10-21	83	A71	137	70.9	0.517518	146	74	0.506849	192	203.153	1
202	2011-08-10	2011-10-21	72	A77	148	76.3	0.515541	170	121	0.711765	191	203.962	1
203	2011-04-14	2011-10-17	186	BP4	149	78.8	0.528859	168	95.9	0.570833	195	205.465	1
204	2011-04-06	2011-10-14	191	A20	141	72.2	0.512057	165	87.2	0.528485	189	206.077	1
205	2011-04-14	2011-10-17	186	BP4	150	78.8	0.525333	170	96.1	0.565294	187	206.316	1
206	2011-08-10	2011-10-21	72	A77	138	66	0.478261	153	83	0.542484	191	206.796	1
207	2011-04-14	2011-10-17	186	CB5	147	76.4	0.519728	168	97.1	0.577976	189	206.891	1
208	2011-07-06	2011-10-21	107	M62	150	67.9	0.452667	170	104.8	0.616471	205	208.042	1
209	2011-04-06	2011-10-17	194	A20	143	76.2	0.532867	161	88	0.546584	198	208.671	1
210	2011-07-18	2011-10-21	95	A70	143	65.8	0.46014	155	84	0.541935	205	209.697	1
211	2011-06-17	2011-10-17	122	A44	144	67.1	0.465972	160	105	0.65625	196	213.26	1
212	2011-04-14	2011-10-17	186	CB5	144	74.2	0.515278	168	99.1	0.589881	202	213.577	1
213	2011-04-06	2011-10-17	194	M43	147	75.6	0.514286	165	91.4	0.553939	211	217.859	1
214	2011-06-17	2011-10-17	122	A44	147	68.9	0.468707	164	100	0.609756	203	220.147	1
215	2011-07-06	2011-10-21	107	M62	149	69.6	0.467114	165	90.7	0.549697	209	225.462	1
216	2011-04-14	2011-10-17	186	BP4	148	78	0.527027	170	98	0.576471	215	226.759	1
217	2011-08-10	2011-10-21	72	A77	140	67.3	0.480714	169	132	0.781065	209	254	1
218	2011-07-06	2011-10-21	107	M62	140	62.2	0.444286	164	99	0.603659	208	228.101	1
219	2011-07-06	2011-10-21	107	M62	140	64.1	0.457857	164	100.9	0.615244	199	229.4	1
220	2011-07-30	2011-10-21	83	A71	139	71.2	0.51223	159	108	0.679245	219	232.541	1
221	2011-04-14	2011-10-17	186	M28	147	75.9	0.516327	157	86.2	0.549045	200	233.6	1
222	2011-04-14	2011-10-14	183	CB5	149	80	0.536913	161	82.3	0.51118	208	234.231	1
223	2011-08-10	2011-10-21	72	A77	144	75.1	0.521528	160	101	0.63125	223	235.558	1
224	2011-08-10	2011-10-21	72	A77	139	73.7	0.530216	157	85	0.541401	220	237.073	1
225	2011-08-10	2011-10-21	72	A77	142	74.1	0.521831	166	110	0.662651	207	237.283	1
226	2011-07-30	2011-10-21	83	A71	137	67.2	0.490511	162	112	0.691358	212	238.223	1
227	2011-04-14	2011-10-14	183	CB5	150	80	0.533333	162	88.5	0.546296	213	238.452	1
228	2011-04-14	2011-10-17	186	CB5	148	80.7	0.54527	163	92.6	0.568098	205	239.168	1
229	2011-04-14	2011-10-17	186	BP4	152	78.8	0.518421	174	113.5	0.652299	221	240.531	1
230	2011-04-14	2011-10-14	183	M28	145	75.1	0.517931	168	109.7	0.652976	220	242.227	1
231	2011-06-17	2011-10-17	122	A44	145	65.3	0.450345	163	123	0.754601	201	242.555	1
232	2011-04-06	2011-10-17	194	A20	145	78.6	0.542069	167	87.6	0.524551	206	245.25	1
233	2011-08-10	2011-10-21	72	A77	141	73.6	0.521986	159	91	0.572327	211	245.53	1
234	2011-08-10	2011-10-21	72	A77	143	73.4	0.513287	164	98	0.597561	200	247.292	1
235	2011-07-30	2011-10-21	83	A71	139	72.2	0.519424	155	97	0.625806	210	247.549	1
236	2011-07-30	2011-10-21	83	A71	143	76.2	0.532867	171	136	0.795322	212	247.622	1
237	2011-07-30	2011-10-21	83	A71	140	72.3	0.516429	164	122	0.743902	220	253.094	1
238	2011-04-14	2011-10-17	186	CB5	150	77.6	0.517333	165	102.2	0.619394	213	254.43	1
239	2011-07-30	2011-10-21	83	A71	142	72.9	0.51338	156	99	0.634615	210	260.158	1
240	2011-07-30	2011-10-21	83	A71	141	71	0.503546	156	92	0.589744	220	260.478	1
241	2011-04-14	2011-10-17	186	CB5	151	78	0.516556	170	100.3	0.59	213	262.021	1
242	2011-08-10	2011-10-21	72	A77	139	65.5	0.471223	160	104	0.65	209	262.139	1
243	2011-07-18	2011-10-21	95	A70	142	64.4	0.453521	161	103	0.639752	216	262.993	1
244	2011-04-14	2011-10-17	186	CB5	150	78.4	0.522667	168	97.7	0.581548	228	263.695	1
245	2011-06-17	2011-10-21	126	A44	144	70	0.486111	158	93	0.588608	231	265.884	1
246	2011-07-30	2011-10-21	83	A71	135	67.5	0.5	159	104	0.654088	223	266.252	1
247	2011-07-06	2011-10-21	107	M62	145	66.1	0.455862	171	110.1	0.64386	231	269.154	1
248	2011-04-14	2011-10-14	183	CB5	150	79.4	0.529333	168	97.6	0.580952	226	272.168	1
249	2011-08-10	2011-10-21	72	A77	145	77.5	0.534483	170	136	0.8	230	272.695	1
250	2011-06-17	2011-10-21	126	A44	150	65.7	0.438	166	122	0.73494	219	274.491	1
251	2011-04-06	2011-10-17	194	A20	144	73.1	0.507639	166	89	0.536145	221	275.533	1
252	2011-07-18	2011-10-21	95	A70	141	63.1	0.447518	161	89	0.552795	234	275.564	1
253	2011-07-01	2011-10-17	108	M55	150	76.6	0.510667	165	112	0.678788	207	277.178	1
254	2011-07-06	2011-10-21	107	M62	140	68.2	0.487143	165	117.2	0.710303	203	279.156	1
255	2011-07-30	2011-10-21	83	A71	141	73.3	0.519858	164	115	0.70122	230	279.621	1
256	2011-04-14	2011-10-14	183	BP4	148	78.3	0.529054	169	111.7	0.660947	201	280.071	1
257	2011-08-10	2011-10-21	72	A77	142	72.1	0.507746	160	93	0.58125	218	281.179	1
258	2011-06-17	2011-10-17	122	A44	151	68.7	0.454967	170	127	0.747059	221	281.604	1
259	2011-04-14	2011-10-14	183	CB5	150	78.6	0.524	166	97.3	0.586145	203	282.864	1
260	2011-04-14	2011-10-14	183	BP4	146	75.3	0.515753	170	100.8	0.592941	200	283.652	1
261	2011-04-06	2011-10-17	194	A20	145	75.9	0.523448	169	102	0.60355	211	285.252	1
262	2011-04-14	2011-10-17	186	CB5	152	78.4	0.515789	168	100.2	0.596429	236	288.439	1
263	2011-07-06	2011-10-21	107	M62	143	70.1	0.49021	170	117	0.688235	208	290.141	1
264	2011-08-10	2011-10-21	72	A77	141	69.6	0.493617	158	90	0.56962	211	290.608	1
265	2011-08-10	2011-10-21	72	A77	147	73.3	0.498639	163	105	0.644172	209	292.217	1
266	2011-07-06	2011-10-21	107	M62	145	77.3	0.533103	168	113.8	0.677381	206	296.977	1
267	2011-08-10	2011-10-21	72	A77	146	75.5	0.517123	168	115	0.684524	230	315.502	1
268	2011-08-10	2011-10-21	72	A77	143	74.5	0.520979	173	135	0.780347	222	321.948	1
269	2011-06-17	2011-10-17	122	A44	145	68.9	0.475172	165	112	0.678788	231	328.216	1
270	2011-04-14	2011-10-17	186	CB5	150	77.4	0.516	171	112.2	0.65614	234	333.321	1
271	2011-04-14	2011-10-14	183	M28	150	80.4	0.536	168	113.9	0.677976	236	336.28	1
272	2011-04-14	2011-10-14	183	BP4	148	77.1	0.520946	172	110.1	0.640116	246	351.688	1
273	2011-08-10	2011-10-21	72	A77	148	73.1	0.493919	178	123	0.691011	237	357.302	1
274	2011-04-14	2011-10-14	183	CB5	150	78.3	0.522	172	118.4	0.688372	241	363.446	1
275	2011-08-10	2011-10-21	72	A77	145	71.9	0.495862	175	142	0.811429	243	370.224	1
276	2011-04-14	2011-10-14	183	CB5	150	78.5	0.523333	175	130	0.742857	252	408.563	1
277	2011-08-10	2011-10-21	72	A75	140	73.5	0.525	158	88	0.556962	181	110	1
278	2011-08-10	2011-10-21	72	A75	139	71.9	0.517266	155	85	0.548387	175	105	1
279	2011-08-10	2011-10-21	72	A75	147	75	0.510204	157	90	0.573248	171	103	1
280	2011-08-10	2011-10-21	72	A77	142	70.8	0.498592	156	84	0.538462	179	109	1
281	2011-04-14	2011-06-27	74	BP4	149	77.8	0.522148	174	102.3	0.587931	182	124	1
282	2011-07-01	2011-10-21	112	M55	147	74.3	0.505442	159	98	0.616352	163	118	1
283	2011-04-06	2011-10-17	194	A20	137	67.7	0.494161	155	73.9	0.476774	168	92	1
284	2011-04-14	2011-11-02	202	BP4	151	79.1	0.523841	165	87.5	0.530303	179	93	1
285	2011-04-14	2011-06-30	77	BP4	145	76.2	0.525517	158	99	0.626582	181	127	1
286	2011-04-14	2011-10-21	190	M28	146	76.4	0.523288	162	89.9	0.554938	177	106	1
287	2011-04-14	2011-08-31	139	BP4	148	74.9	0.506081	162	75.6	0.466667	171	131.416	1
288	2011-04-06	2011-10-17	194	A20	142	76.7	0.540141	165	88.5	0.536364	168	131.705	1
289	2011-07-30	2011-10-21	83	A71	141	74.5	0.528369	161	98	0.608696	182	140	1
290	2011-07-01	2011-10-16	107	M55	152	77.8	0.511842	161	90	0.559006	177	145.021	1
291	2011-04-06	2011-10-11	188	A20	142	75.7	0.533099	160	88	0.55	181	153.849	1
292	2011-04-14	2011-10-17	186	BP4	150	80	0.533333	168	93	0.553571	177	163.513	1
293	2011-07-06	2011-10-21	107	M62	143	72.6	0.507692	165	106.7	0.646667	181	168.662	1
294	2011-07-01	2011-10-21	112	M55	150	73.9	0.492667	158	95	0.601266	175	169.473	1
295	2011-07-06	2011-10-21	107	M62	148	69.7	0.470946	170	94	0.552941	178	170.613	1
296	2011-07-06	2011-10-04	90	M62	146	71.1	0.486986	174	101.2	0.581609	181	179.681	1
297	2011-07-06	2011-10-17	103	M62	143	71.1	0.497203	169	99.7	0.589941	178	179.828	1
298	2011-07-06	2011-10-06	92	M62	140	67.7	0.483571	170	123	0.723529	194	212.544	1
299	2011-06-17	2011-10-21	126	A44	144	67.2	0.466667	164	111	0.676829	196	223.675	1
300	2011-07-06	2011-10-17	103	M62	140	67.8	0.484286	170	119.7	0.704118	194	224.571	1
